# Supplementary material
Source: Springer Nature journal article supplement (https://www.springermedizin.de/resource/supplementary/13045_2010_116_MOESM1_ESM.pdf/9660692)

## Immulate Counts vs IgE Concentration

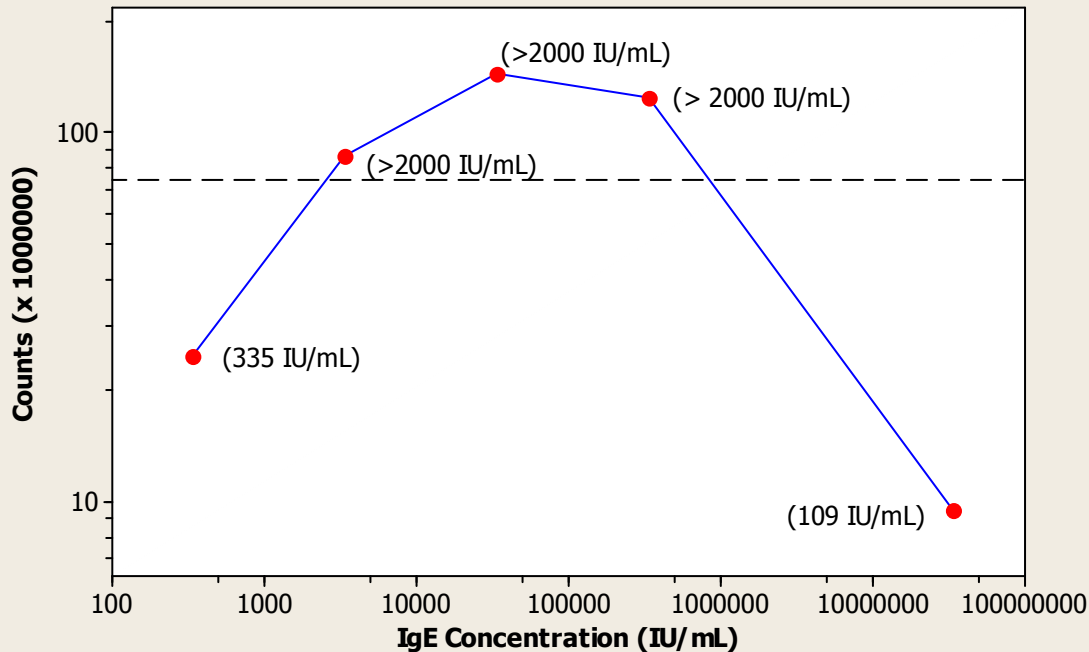

Supplement: MOESM1 [file 9660692]
